# Supplementary material for: Hydrological responses to climate change conditioned by historic alterations of land-use and water-use
Source: Copernicus journal article supplement (doi:10.5194/hess-16-1335-2012), 2012-05-09
Supplement: Supplementary file 1 [file Supplementary material_Hydrologic model results.xlsx]

## Sheet: AR4 GCMs
Hydrologic model results (Runoff and Evapotranspiration [ET]) using AR4 GCMs
ET		AR4 GCMs	1961-1990		2010-2039		ET change		Ensemble mean of ET changes		Standard deviation
			observed	not bias corrected	bias corrected	not bias corrected	bias corrected	not bias corrected	bias corrected	not bias corrected	bias corrected	not bias corrected
			(m3/yr)	(m3/yr)	(m3/yr)	(m3/yr)	(km3/yr)	(km3/yr)	(km3/yr)	(km3/yr)
		CRU observation	458258000000						24.0044	27.7981	16.1668	16.1183
		CSIRO-CSMK3		444032000000	502009000000	482982000000	43.751	38.95
		ECHAM5-MPEH5		451666000000	485041000000	480389000000	26.783	28.723
		GFDL-GFCM_20_21		530332000000	459953000000	538527000000	1.695	8.195
		HADCM3		467899000000	501140000000	509225000000	42.882	41.326
		NIES-MIMR		602712000000	468185000000	620999000000	9.927	18.287
		CNCM3		495428000000	494194000000	527891000000	35.936	32.463
		ECHOG		577437000000	473661000000	603090000000	15.403	25.653
		GIER		405503000000	455264000000	397770000000	-2.994	-7.733
		HADGEM		467820000000	482865000000	498636000000	24.607	30.816
		INCM3		654277000000	485744000000	702258000000	27.486	47.981
		IPCM4		625121000000	500435000000	665830000000	42.177	40.709
		MRCGCM		533682000000	496571000000	575956000000	38.313	42.274
		NCCCSM		588552000000	485445000000	623704000000	27.187	35.152
		NCPCM		467828000000	461167000000	474206000000	2.909	6.378
Runoff		AR4 GCMs	1961-1990		2010-2039		Runoff change		Ensemble mean of Runoff changes		Standard deviation of runoff change			Other runoff
			observed	not bias corrected	bias corrected	not bias corrected	bias corrected	not bias corrected	bias corrected	not bias corrected	bias corrected	not bias corrected		change	bias corrected	not bias corrected
			(km3/yr)	(km3/yr)	(km3/yr)	(km3/yr)	(km3/yr)	(km3/yr)	(km3/yr)	(km3/yr)				statistics	(km3/yr)	(km3/yr)
		CRU observation	10.1						-4.55714	-8.3	9.31382	15.3573		Minimum DQ	-16.7	-37.2
		CSIRO-CSMK3		93.9	18.7	107.4	8.6	13.5						DQ 25 percentile	-11.9	-18.375
		ECHAM5-MPEH5		42.3	7.8	38.1	-2.3	-4.2						DQ 50 percentile	-8.45	-7.8
		GFDL-GFCM_20_21		138	1.1	121.8	-9	-16.2						DQ 75 percentile	4.225	5.925
		HADCM3		129.1	18.8	139.3	8.7	10.2						Maximum DQ	8.7	13.5
		NIES-MIMR		64	-3.5	42.8	-13.6	-21.2
		CNCM3		383.8	15.6	392.9	5.5	9.1
		ECHOG		101.2	-4.6	76.2	-14.7	-25
		GIER		55.7	1.1	51.6	-9	-4.1
		HADGEM		128.3	-2.5	109.7	-12.6	-18.6
		INCM3		204.7	-6.6	167.5	-16.7	-37.2
		IPCM4		271.4	18.7	281.6	8.6	10.2
		MRCGCM		121.4	10.5	117.8	0.4	-3.6
		NCCCSM		103.1	0.3	85.4	-9.8	-17.7
		NCPCM		52.7	2.2	41.3	-7.9	-11.4

## Sheet: TAR GCMs
Hydrologic model results (Runoff and Evapotranspiration [ET]) using TAR GCMs
ET		TAR GCMs	1961-1990		2010-2039		ET change		Ensemble mean of ET changes		Standard deviation
			observed	not bias corrected	bias corrected	not bias corrected	bias corrected	not bias corrected	bias corrected	not bias corrected	bias corrected	not bias corrected
			(m3/yr)	(m3/yr)	(m3/yr)	(m3/yr)	(km3/yr)	(km3/yr)	(km3/yr)	(km3/yr)
		CRU observation	458258000000						28.2037	38.3537	33.3063	22.8196
		CCCma-CGCM2		481530000000	461434000000	519766000000	3.176	38.236
		CSIRO-MK2		407303000000	497315000000	443328000000	39.057	36.025
		ECHAM4		539344000000	536601000000	618408000000	78.343	79.064
		GFDL99-R30		430788000000	487551000000	461034000000	29.293	30.246
		HADCM3		467628000000	496225000000	505403000000	37.967	37.775
		CCSR/NIES		737442000000	439644000000	746218000000	-18.614	8.776
														Other runoff
Runoff		TAR GCMs	1961-1990		2010-2039		Runoff change		Ensemble mean of Runoff changes		Standard deviation			change	bias corrected	not bias corrected
			observed	not bias corrected	bias corrected	not bias corrected	bias corrected	not bias corrected	bias corrected	not bias corrected	bias corrected	not bias corrected		statistics	(km3/yr)	(km3/yr)
			(km3/yr)	(km3/yr)	(km3/yr)	(km3/yr)	(km3/yr)	(km3/yr)	(km3/yr)	(km3/yr)				Minimum DQ	-26.5	-61.6
		CRU observation	10.1						-6.28333	-15.5333	15.5681	30.8453		DQ 25 percentile	-19.3	-35.675
		CCCma-CGCM2		235.2	-16.4	173.6	-26.5	-61.6						DQ 50 percentile	1.9	3.1
		CSIRO-MK2		65.6	10.9	69.6	0.8	4						DQ 75 percentile	4.575	4.3
		ECHAM4		58.7	15.2	63.1	5.1	4.4						Maximum DQ	5.9	6.1
		GFDL99-R30		-4.1	13.1	-1.9	3	2.2
		HADCM3		129.3	16	135.4	5.9	6.1
		CCSR/NIES		172.6	-15.9	124.3	-26	-48.3
